# Supplementary material
Source: PubMed Central journal article supplement (PMC2569174)
Supplement: blood-2008-03-143479_2.pdf [file blood-2008-03-143479_2.pdf]

| <b>Gene</b>   | <b>GenBank No.</b> | <b>Forward primer</b>    | <b>Reverse primer</b>    |
|---------------|--------------------|--------------------------|--------------------------|
| Human eNOS    | NM_000603          | AGGAACCTGTGTGACCCTCA     | CGAGGTGGTCCGGGTATCC      |
| Human GAPDH   | NM_002046          | TGCACCACCAACTGCTTAGC     | GGCATGGACTGTGGTCATGAG    |
| Porcine eNOS  | AY266137           | CCCTACAACGGCTCCCCTC      | GCTGTCTGTGTTACTGGATTCCTT |
| Porcine GAPDH | AF017079           | TGTACCACCAACTGCTTGGC     | GGCATGGACTGTGGTCATGAG    |
| Human NOX4    | NM_016931          | TGGCTTTGGATTTCTGGACCTTG  | ATGATGGTGACTGGCTTATTGCTC |
| Human SOD1    | NM_000454          | ATGACTTGGGCAAAGGTGGAAATG | GTTAAGGGGCCTCAGACTACATCC |
| Human CAT     | NM_001752          | GCGGAGATTCAACACTGCCAATG  | CTGTTCTCATTTCAGCACGTTAC  |
