# Supplementary material
Source: PubMed Central journal article supplement (PMC2569174)
Supplement: blood-2008-03-143479_3.pdf [file blood-2008-03-143479_3.pdf]

| miRNA        | MirBase #                                                       | miRNA Sequence(s)                                                                                      | RT-PCR Primer sequenc(s)                                                                             | sCD40L vs Control | TNF- $\alpha$ vs Control |
|--------------|-----------------------------------------------------------------|--------------------------------------------------------------------------------------------------------|------------------------------------------------------------------------------------------------------|-------------------|--------------------------|
| let-7-family | MIMAT0000062,<br>MIMAT0000064,<br>MIMAT0000065,<br>MIMAT0000067 | ugagguaguagguuuguauaguu,<br>ugagguaguagguuuguaguu,<br>agagguaguagguugcauagu,<br>ugagguaguagauuguauaguu | tgaggtagtaggtgtatagtt,<br>tgaggtagtaggtgtatagtt,<br>agaggtagtaggtgtcatagt,<br>tgaggtagtagattgtatagtt | 0.2031            | 0.0884                   |
| miR-7        | MIMAT0000252                                                    | uggaagacuagugauuuuguug                                                                                 | tggaagactagtgattttgtg                                                                                | 0.7371            | 0.9727                   |
| miR-92       | MIMAT0000092                                                    | uauugcacuugucccgccug                                                                                   | tattgactgtcccggcctg                                                                                  | 0.7022            | 0.8645                   |
| miR-93       | MIMAT0000093                                                    | aaagugcuguucgugcagguag                                                                                 | aaagtgtcttctgcaggtag                                                                                 | 0.8766            | 1.0070                   |
| miR-9-1      | MIMAT0000441                                                    | ucuuugguuaucuagcuguauga                                                                                | tctttgttatctagctgtatga                                                                               | 1.2058            | 1.0497                   |
| miR-101-1    | MIMAT0000099                                                    | uacaguacuguguaaacugaag                                                                                 | tacagtactgtgataactgaag                                                                               | 1.4340            | 1.1647                   |
| miR-103      | MIMAT0000101                                                    | agcagcauuguacagggucauga                                                                                | agcagcattgtacagggtatga                                                                               | 1.4044            | 1.6133                   |
| miR-106a     | MIMAT0000103                                                    | aaaagugcuuacagugcagguagc                                                                               | aaaagtgtctacagtcaggtagc                                                                              | 1.0792            | 1.2397                   |
| miR-106b     | MIMAT0000680                                                    | uaaagugcugacagugcagau                                                                                  | taaagtgtgacagtcagat                                                                                  | 1.2142            | 1.0570                   |
| miR-107      | MIMAT0000104                                                    | agcagcauuguacagggucauca                                                                                | agcagcattgtacagggtatca                                                                               | 1.2570            | 1.2570                   |
| miR-10b      | MIMAT0000254                                                    | uaccugugaacccaauuuugu                                                                                  | taccctgtagaaccgaattgt                                                                                | 1.0718            | 1.0718                   |
| miR-1-1      | MIMAT0000416                                                    | uggaauguaaagaaguugua                                                                                   | tggaatgtaaagaagtatga                                                                                 | 0.5176            | 0.2774                   |
| miR-122a     | MIMAT0000421                                                    | uggagugugacaaugguguuugu                                                                                | tggagtgtgacaatgggtttgt                                                                               | 0.4830            | 0.4204                   |
| miR-125a     | MIMAT0000443                                                    | ucccugagaccuuuaaccugug                                                                                 | tccctgagacccttaacctgtg                                                                               | 1.0353            | 1.1892                   |
| miR-125b     | MIMAT0000423                                                    | ucccugagaccuuacuuguga                                                                                  | tccctgagaccctaactgtga                                                                                | 0.9013            | 1.0353                   |
| miR-126      | MIMAT0000444                                                    | cauuuuacuauuuuguacgcg                                                                                  | cattattacttttggtacgcg                                                                                | 0.9794            | 1.1251                   |
| miR-128b     | MIMAT0000676                                                    | ucacagugaaccggucucuuc                                                                                  | tcacagtaaccggtctcttc                                                                                 | 0.0202            | 0.0071                   |
| miR-132      | MIMAT0000426                                                    | uaacagucuacagccauggucg                                                                                 | taacagtctacagccatggtcg                                                                               | 0.8011            | 0.8011                   |
| miR-133a     | MIMAT0000427                                                    | uuggucccuucaaccagcugu                                                                                  | ttggtcccctcaaccagctgt                                                                                | 0.3121            | 0.2535                   |
| miR-134      | MIMAT0000447                                                    | ugugacugguugaccagaggg                                                                                  | tgtgactggtgaccagaggg                                                                                 | 0.5704            | 0.8066                   |
| miR-135b     | MIMAT0000758                                                    | uauggcuuucauuccuauugug                                                                                 | tatggctttcattctatgtg                                                                                 | 0.2285            | 0.2132                   |
| miR-136      | MIMAT0000448                                                    | acuccauuuuguuugaugaugga                                                                                | actccattgtttgatgatgga                                                                                | 0.8467            | 0.7371                   |
| miR-137      | MIMAT0000429                                                    | uauugcuuaagaaucgcguag                                                                                  | tattgcttaagaatacgcgtag                                                                               | 0.9862            | 0.8586                   |
| miR-140      | MIMAT0000431                                                    | agugguuuuaccuauugguag                                                                                  | agtggttttaccctatggtag                                                                                | 0.4061            | 0.2679                   |
| miR-141      | MIMAT0000432                                                    | uaacacugucugguaaagaugg                                                                                 | taaacactgtctgtaaagatgg                                                                               | 0.9659            | 0.9013                   |
| miR-142-3p   | MIMAT0000434                                                    | uguaguguuuccuacuuaugga                                                                                 | tgtagtgttctactttatgga                                                                                | 0.1560            | 0.1456                   |
| miR-143      | MIMAT0000435                                                    | ugagaugaagcacugagcuca                                                                                  | tgagatgaagcactgtagctca                                                                               | 0.6830            | 0.5548                   |
| miR-145      | MIMAT0000437                                                    | guccaguuuucccaggaauccuu                                                                                | gtccagtttcccaggaaaccctt                                                                              | 0.8011            | 0.5664                   |
| miR-146a     | MIMAT0000449                                                    | ugagaacugaaauccauggguu                                                                                 | tgagaactgaattccatgggtt                                                                               | 1.8277            | 1.8277                   |
| miR-149      | MIMAT0000450                                                    | ucuggcuccgugucuacucc                                                                                   | tctggctccgtgtcttccactcc                                                                              | 0.9931            | 0.8645                   |
| miR-150      | MIMAT0000451                                                    | ucucccaaccuuguaccagug                                                                                  | tctccaaccctgtaccagtg                                                                                 | 0.6598            | 0.7579                   |
| miR-151      | MIMAT0000757                                                    | acuagacugaagcuccuugagg                                                                                 | actagactgaagctcctgagg                                                                                | 1.0210            | 1.1728                   |
| miR-153      | MIMAT0000439                                                    | uugcauagucacaaaaguga                                                                                   | ttgcatagtacaaaagtga                                                                                  | 0.3536            | 0.5359                   |
| miR-154      | MIMAT0000452                                                    | uagguuauccgugugccuucg                                                                                  | taggttatccgtgttccttcg                                                                                | 0.4175            | 0.4796                   |
| miR-155      | MIMAT0000646                                                    | uuauugcuauucgugauagggg                                                                                 | ttaatgtaatcgtagagggg                                                                                 | 1.0210            | 1.2570                   |
| miR-15a      | MIMAT0000068                                                    | uagcagcacauaauuguuugug                                                                                 | tagcagcacataatggtttgtg                                                                               | 1.0943            | 1.0210                   |
| miR-15b      | MIMAT0000417                                                    | uagcagcacaucaugguuuaca                                                                                 | tagcagcacatcatggtttaca                                                                               | 1.1019            | 1.4540                   |
| miR-16       | MIMAT0000069                                                    | uagcagcacguaaauuuggcg                                                                                  | tagcagcacgtaaatattggcg                                                                               | 1.3851            | 1.4845                   |
| miR-17-3p    | MIMAT0000071                                                    | acugcagugaaggcacuugu                                                                                   | actgcagtgaaggcactgtt                                                                                 | 0.8351            | 0.7270                   |
| miR-17-5p    | MIMAT0000070                                                    | caaagugcuuacagugcagguagu                                                                               | caaagtgtctacagtcaggtag                                                                               | 1.0425            | 1.1173                   |
| miR-181a     | MIMAT0000256                                                    | aacauucaacgcugucggugagu                                                                                | aacattcaacgctgtcggtgagt                                                                              | 0.7320            | 1.3660                   |
| miR-181b     | MIMAT0000257                                                    | aacauucauugcugucgguggg                                                                                 | aacattcattgctgtcggtggg                                                                               | 1.2924            | 1.4845                   |
| miR-181c     | MIMAT0000258                                                    | aacauucaaccugucggugagu                                                                                 | aacattcaacctgtcggtgagt                                                                               | 0.1672            | 0.0780                   |
| miR-181d     | MIMAT00002821                                                   | aacauucauuguugucgguggguu                                                                               | aacattcattgtgtcggtgggtt                                                                              | 1.0425            | 1.1975                   |
| miR-183      | MIMAT0000261                                                    | uauggcacugguagaauucacug                                                                                | tatggcactggtagaattcactg                                                                              | 0.2832            | 0.1743                   |

|             |                                                |                                                                            |                                                                          |        |         |
|-------------|------------------------------------------------|----------------------------------------------------------------------------|--------------------------------------------------------------------------|--------|---------|
| miR-185     | MIMAT0000455                                   | uggagagaaagcgaguuc                                                         | tggagagaaagcgagtc                                                        | 0.7526 | 0.8066  |
| miR-186     | MIMAT0000456                                   | caaagaaucuccuuugggcuu                                                      | caaagaattctcctttgggctt                                                   | 0.6830 | 0.7320  |
| miR-188     | MIMAT0000457                                   | caucccuugcaugguggagggu                                                     | catcccttgcattggtggagggt                                                  | 0.2755 | 0.1696  |
| miR-18a     | MIMAT0000072                                   | uaaggugcaucuagugcagaua                                                     | taagggtcatctagtgacagata                                                  | 1.1647 | 1.3379  |
| miR-190     | MIMAT0000458                                   | ugauauguuugauauuuaggu                                                      | tgatattgtgatatttaggt                                                     | 0.2973 | #VALUE! |
| miR-191     | MIMAT0000440                                   | caacggaaucacaaaagcagcu                                                     | caacggaatccaaaagcagct                                                    | 1.2658 | 0.0300  |
| miR-192     | MIMAT0000222                                   | cugaccuaugaauugacagcc                                                      | ctgacctatgaattgacagcc                                                    | 0.7684 | 0.8236  |
| miR-194     | MIMAT0000460                                   | uguacagcaacuccaugugga                                                      | tgtaacagcaactccatgtgga                                                   | 0.5249 | 0.3978  |
| miR-195     | MIMAT0000461                                   | uagcagcacagaaauuuggc                                                       | tagcagcacagaaatattggc                                                    | 1.2570 | 1.3472  |
| miR-196a    | MIMAT0000226                                   | uagguaguuucauguuguugg                                                      | taggtagtctatgtgtgtgg                                                     | 0.5864 | 0.5105  |
| miR-197     | MIMAT0000227                                   | uucaccaccuuccaccaccagc                                                     | ttcaccacctctccaccaccagc                                                  | 1.0353 | 1.1892  |
| miR-198     | MIMAT0000228                                   | gguccagaggggagauagg                                                        | ggtcagaggggagatagg                                                       | 0.4175 | 0.2952  |
| miR-199a+b  | MIMAT0000231,<br>MIMAT0000263                  | cccaguguucagacuaccuguuc,<br>cccaguguuuagacuauccuguuc                       | cccagtgctcagactacctgttc,<br>cccagtgcttagactatctgttc                      | 0.8888 | 1.5476  |
| miR-30b     | MIMAT0000420                                   | uguaaaauccuacacucagcu                                                      | tgtaaacatctacactcagct                                                    | 0.8351 | 0.6783  |
| miR-19a+b   | MIMAT0000073,<br>MIMAT0000074                  | ugugcaaaucuaugcaaaacuga,<br>ugugcaaaucuaugcaaaacuga                        | tgtgcaaatctatgcaaaactga,<br>tgtgcaaatctatgcaaaactga                      | 0.3015 | 0.2449  |
| miR-95      | MIMAT0000094                                   | uucaacggguuuuuuugagca                                                      | ttcaacgggtatttattgagca                                                   | 0.9330 | 0.7579  |
| miR-20a     | MIMAT0000075                                   | uaaagugcuuauagugcagguag                                                    | taaagtgtctatagtcaggtag                                                   | 0.9266 | 1.1408  |
| miR-200a    | MIMAT0000682                                   | uaacacugucugguaacgaugu                                                     | taacactgtctgtaacgatgt                                                    | 0.3686 | 1.5801  |
| miR-200b    | MIMAT0000318                                   | uaauacugccugguaauaugac                                                     | taatactgcctgtaaatgatgac                                                  | 0.4444 | 0.3143  |
| miR-200c    | MIMAT0000617                                   | uaauacugccggguauaugugg                                                     | taatactgcgggtaaatgatgg                                                   | 0.3869 | 0.3143  |
| miR-202     | MIMAT0002811                                   | agagguauagggcaguggaaaa                                                     | agaggatagggcattggaaaa                                                    | 1.4044 | 0.3763  |
| miR-203     | MIMAT0000264                                   | gugaaauguuaggaccacuag                                                      | gtgaaatgttaggaccactag                                                    | 0.4931 | 0.4293  |
| miR-204     | MIMAT0000265                                   | uuccuuugucauccuauugccu                                                     | ttcccttgcctctctatgctt                                                    | 1.2746 | 1.4641  |
| miR-205     | MIMAT0000266                                   | uccuucuuuccaccggagucug                                                     | tccttcattccaccggagtctg                                                   | 0.0947 | 0.0136  |
| miR-206     | MIMAT0000462                                   | uggaauguaaggaugugugg                                                       | tggaatgtaaggaagtgtgtgg                                                   | 0.2517 | 0.2192  |
| miR-21      | MIMAT0000076                                   | uagcuuauacagacugauguuga                                                    | tagctatcagactgatgttga                                                    | 1.1408 | 1.4044  |
| miR-210     | MIMAT0000267                                   | cugugcgugugacagcggcuga                                                     | ctgtgcgtgtgacagcggctga                                                   | 0.9526 | 0.6285  |
| miR-214     | MIMAT0000271                                   | acagcaggcacagacaggcag                                                      | acagcaggcacagacaggcag                                                    | 1.7901 | 1.1810  |
| miR-215     | MIMAT0000272                                   | augaccuaugaauugacagac                                                      | atgacctatgaattgacagac                                                    | 0.2698 | 0.1550  |
| miR-372     | MIMAT0000724                                   | aaagugcugcgacuuugagcgu                                                     | aaagtgtcgcacattgagcgt                                                    | 0.4147 | 0.3143  |
| miR-373     | MIMAT0000726                                   | gaagugcuucgauuuuggguggu                                                    | gaagtgtctgattttgggggtg                                                   | 0.4796 | 0.7792  |
| miR-218     | MIMAT0000275                                   | uugugcuugaucuaaccaugu                                                      | ttgtgtctgatctaacatgt                                                     | 0.7955 | 1.2058  |
| miR-219     | MIMAT0000276                                   | ugauuguccaaacgcaauucu                                                      | tgattgtccaaacgcaattct                                                    | 0.1895 | 0.1166  |
| miR-22      | MIMAT0000077                                   | aagcugccaguugaagaacugu                                                     | aagctgccagttgaagaactgt                                                   | 1.1567 | 1.0792  |
| miR-488     | MIMAT0002804                                   | cccagauaauggcacucucuaa                                                     | cccagataatggcactctcaa                                                    | 0.1638 | 0.1638  |
| miR-221     | MIMAT0000278                                   | agcuacauugucugcggguuuc                                                     | agctacattgtctgtgggttc                                                    | 1.3755 | 1.4743  |
| miR-222     | MIMAT0000279                                   | agcuacauugcucucgggucuc                                                     | agctacatctggctactgggtctc                                                 | 0.9266 | 0.8645  |
| miR-223     | MIMAT0000280                                   | ugucaguuugcaaaacccc                                                        | tgctagttgtcaaatacccc                                                     | 0.4569 | 0.3231  |
| miR-224     | MIMAT0000281                                   | caagucacuaugguuccguuaa                                                     | caagtactagtggtccgttta                                                    | 0.8645 | 1.1408  |
| miR-23a     | MIMAT0000078                                   | aucacauugccagggaauucc                                                      | atcattgccagggtattcc                                                      | 1.3013 | 1.4948  |
| miR-24      | MIMAT0000080                                   | uggcucaguucagcaggaacag                                                     | tggctcagttcagcaggaacag                                                   | 1.3947 | 1.6021  |
| miR-25      | MIMAT0000081                                   | cauugcacuugucucggucuga                                                     | cattgactgtctcggctctga                                                    | 1.0353 | 1.1892  |
| miR-26a     | MIMAT0000082                                   | uucaaguaauccaggauaggc                                                      | ttcaagtaatccaggataggc                                                    | 1.0281 | 1.0281  |
| miR-26b     | MIMAT0000083                                   | uucaaguaauccaggauagggu                                                     | ttcaagtaatccaggatagggt                                                   | 0.6156 | 0.3536  |
| miR-27a+b   | MIMAT0000084,<br>MIMAT0000419                  | uucacaguggcuuaguuuccgc,<br>uucacaguggcuuaguuuccgc                          | ttcacagtggctaaagtccgc,<br>ttcacagtggctaaagtctgc                          | 1.1892 | 1.1096  |
| miR-30c     | MIMAT0000244                                   | uguaaaauccuacacucucagc                                                     | tgtaaacatctacactctcagc                                                   | 0.9330 | 0.9330  |
| miR-29a+b+c | MIMAT0000086,<br>MIMAT0000100,<br>MIMAT0000681 | uagcaccuucgaaauccgguu,<br>uagcaccuuugaaauccaguuu,<br>uagcaccuucgaaauccgguu | tagcaccatctgaaatcgggt,<br>tagcaccattgaaatcaggtt,<br>tagcaccattgaaatcgggt | 1.5801 | 1.1975  |

|                   |                |                        |                        |               |               |
|-------------------|----------------|------------------------|------------------------|---------------|---------------|
| <b>miR-30a-3p</b> | MIMAT0000088   | cuucagucggauguuugcagc  | cttcagtcggatgttgacgc   | <b>0.9330</b> | <b>1.1487</b> |
| <b>miR-30a-5p</b> | MIMAT0000087   | uguaaacauccucgacuggaag | tgtaaacatcctcgactggaag | <b>1.2397</b> | <b>1.1567</b> |
| <b>miR-296</b>    | MIMAT0000690   | agggccccccucaauccugu   | agggccccctcaatcctgt    | <b>0.4665</b> | <b>0.4665</b> |
| <b>U6 snRNA</b>   | NCBI: X07425.1 | caccacguuuauacccggug   | caccacgtttatacgccggtg  |               |               |

Yellow highlight indicate miRNAs have potential binding capability to eNOS 3'UTR based on Sanger miRBase-Targets predictive algorithm analysis. Gray highlight indicates different expression of miRNAs between sCD40L- and TNF- $\alpha$ -treated HCAECs.
