# Supplementary material
Source: PubMed Central journal article supplement (PMC2569174)
Supplement: blood-2008-03-143479_4.pdf [file blood-2008-03-143479_4.pdf]

| <b>Gene</b> | <b>Human</b>          | <b>Porcine</b> | <b>Protein homology</b> |
|-------------|-----------------------|----------------|-------------------------|
| CD40L       | NM_000074             | AB040443       | 86%                     |
| CD40        | NM_001250 (variant 1) | AF248545       | 79%                     |
| CD40        | NM_152854 (variant 2) | AF248545       | 82%                     |
